# Supplementary material for: Influence of Ru-substitution on the performance of pyrochlore catalysts in oxidative steam reforming of ethanol
Source: Royal Society of Chemistry journal article supplement (doi:10.1039/d3se01585h), 2024-01-01
Supplement: d3se01585h1.pdf [file d3se01585h1.pdf]

## Supporting information

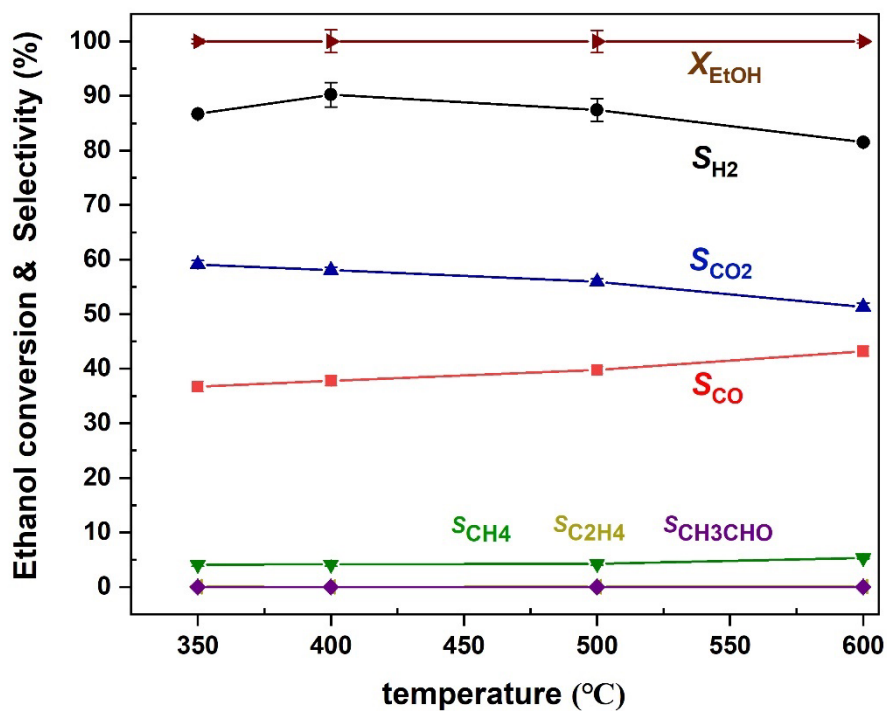

Fig.S1 Selectivity of the LZR02/LZO catalysts at different reaction temperatures  
Reaction condition: GHSV= $1.6 \times 10^5 \text{ h}^{-1}$ ,  $\text{H}_2\text{O}/\text{EtOH} = 3:1$ ,  $\text{O}_2/\text{EtOH}=0.5:1$ .

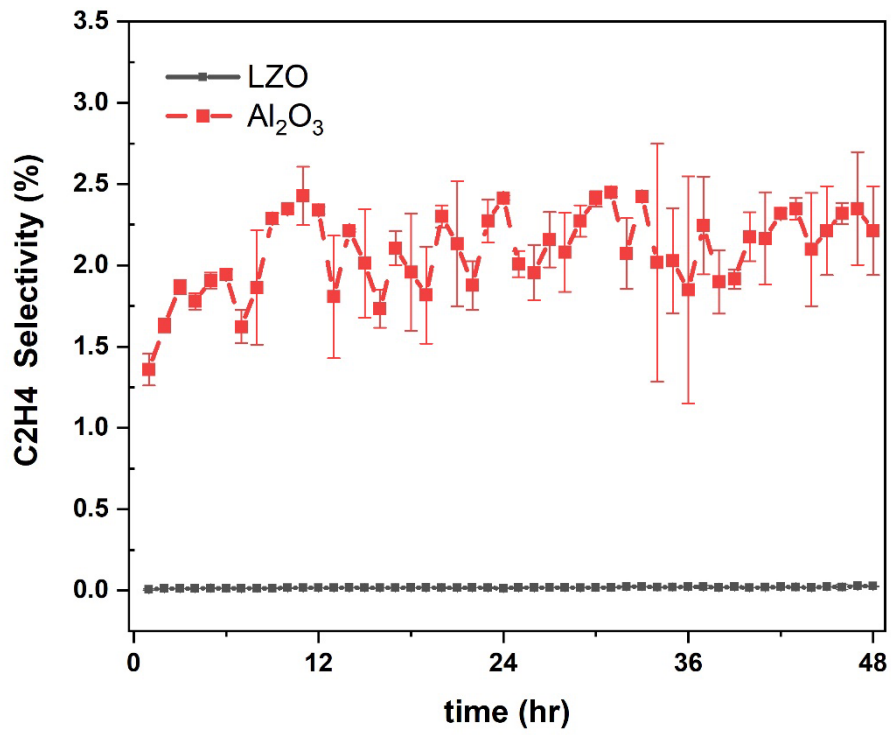

Fig.S2 The proportional production of C<sub>2</sub>H<sub>4</sub> using LZRO02 catalyst supported on LZO (black) or ALO (red) during the long-term stability test.
